# Supplementary material
Source: publisher figshare collection journal article supplement (https://acs.figshare.com/ndownloader/files/36018095)
Supplement: Supplementary file 1 [file 36018095]

## *Supporting Information*

# Tailoring Surface of Natural Graphite with Functional Metal Oxides via a Facile Crystallization for Lithium-ion Batteries

*Jun Won Lee<sup>‡</sup>, So Yeun Kim<sup>‡</sup>, Dong Young Rhee, Sungmin Park, Jae Yup Jung, Min-Sik Park\**

Department of Advanced Materials Engineering for Information and Electronics, Integrated  
Education Institute for Frontier Science & Technology (BK21 Four), Kyung Hee University,  
1732 Deogyeong-daero, Giheung-gu, Yongin 17104, Republic of Korea

<sup>‡</sup>These authors contributed equally.

\*Corresponding author : mspark@khu.ac.kr (M-S. Park)

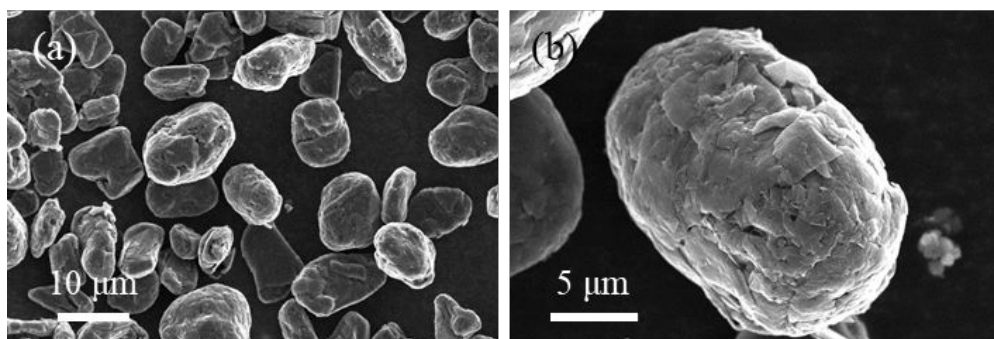

Figure S1. (a) Low-magnification and (b) high-magnification FESEM images of pristine NG.

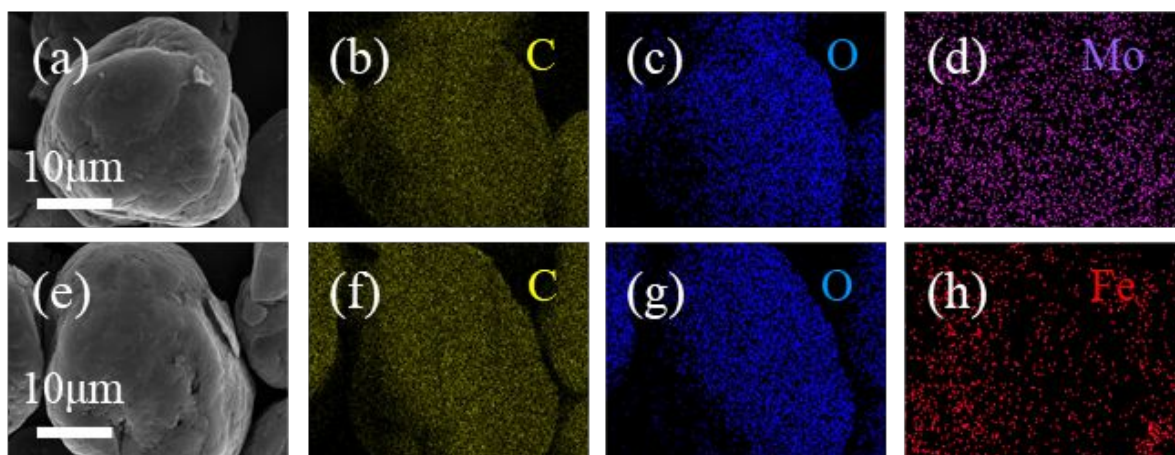

Figure S2. Corresponding EDS elemental mapping results of (a-d) a-MoO<sub>x</sub>-NG and (e-h) a-FeO<sub>x</sub>-NG particles.

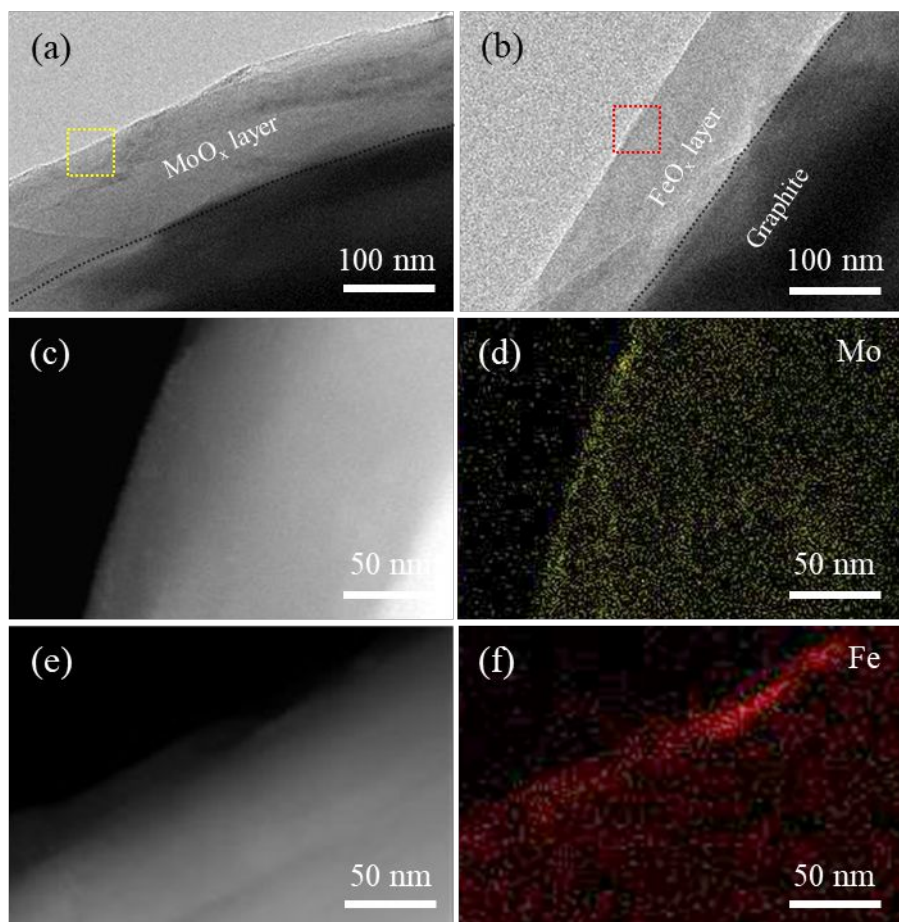

Figure S3. TEM images of (a) a-MoO<sub>x</sub>-NG and (b) a-FeO<sub>x</sub>-NG. Dark-field TEM images and corresponding elemental mapping of (c, d) a-MoO<sub>x</sub>-NG and (e, f) a-FeO<sub>x</sub>-NG; molybdenum (Mo, yellow) and iron (Fe, red)

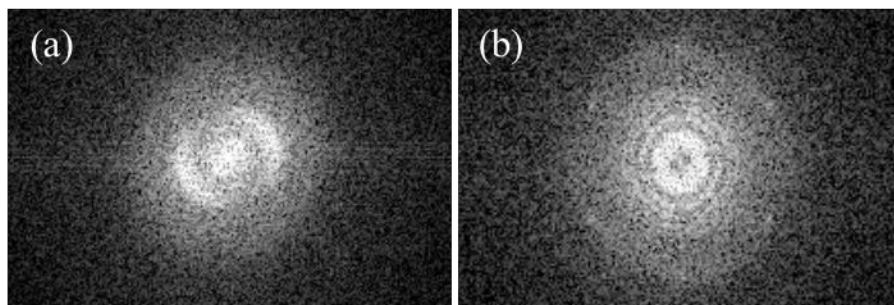

Figure S4. FFT patterns taken from the amorphous regions of (a) c-MoO<sub>2</sub>-NG and (b) c-Fe<sub>3</sub>O<sub>4</sub>-NG.

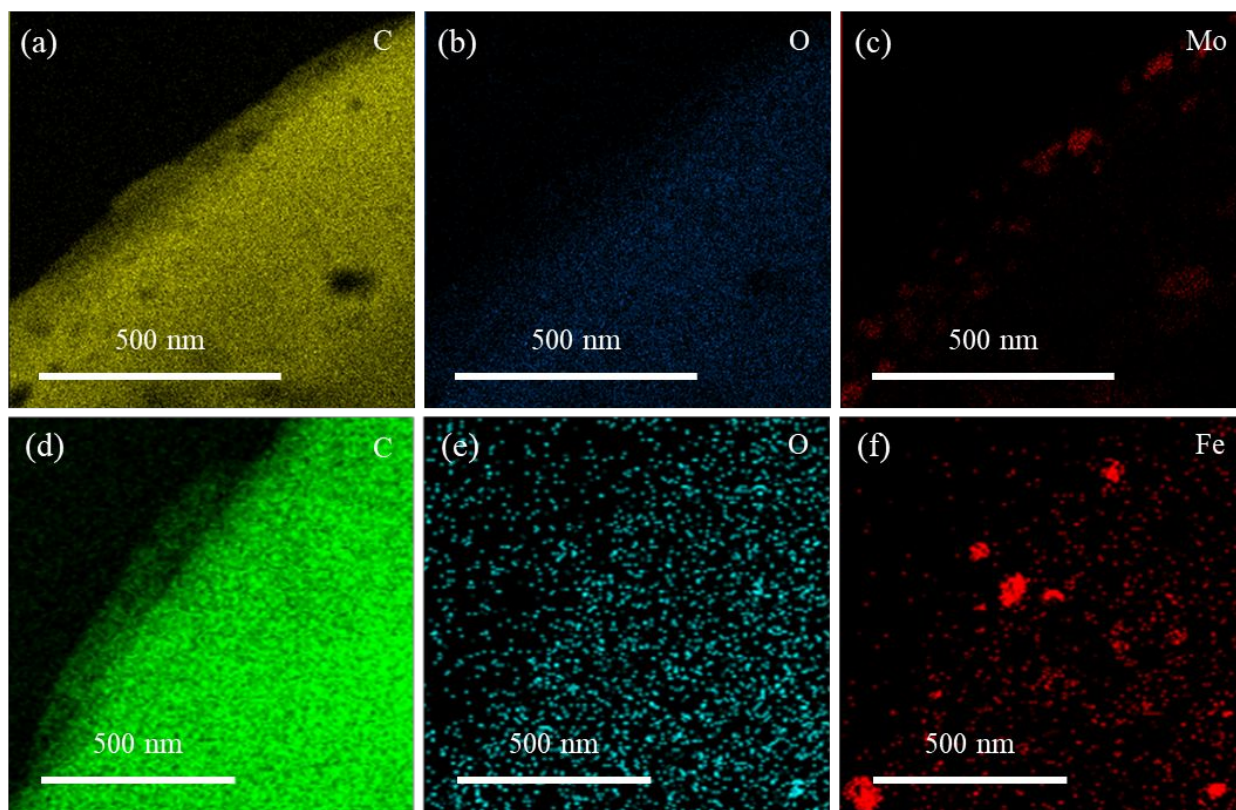

Figure S5. Corresponding EDS elemental mapping results of (a-c) c-MoO<sub>2</sub>-NG and (d-f) c-Fe<sub>3</sub>O<sub>4</sub>-NG prepared by a facile-crystallization process.

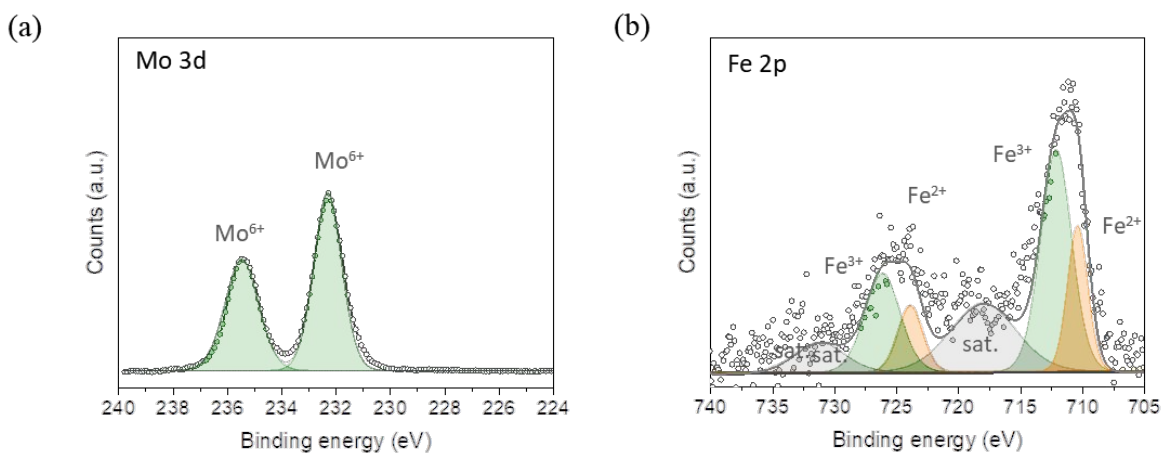

Figure S6. Deconvoluted XPS (a) Mo 3d spectra of a-MoO<sub>x</sub>-NG and (b) Fe 2p spectra of a-FeO<sub>x</sub>-NG composites.

Table S1. The contents of Mo<sup>4+</sup>/Mo<sup>5+</sup>/Mo<sup>6+</sup> from XPS spectrum of a-MoO<sub>x</sub>-NG and c-MoO<sub>2</sub>-NG.

|                  | a-MoO <sub>x</sub> -NG |                   |       | c-MoO <sub>2</sub> -NG |                   |       |
|------------------|------------------------|-------------------|-------|------------------------|-------------------|-------|
|                  | 3d <sub>3/2</sub>      | 3d <sub>5/2</sub> | total | 3d <sub>3/2</sub>      | 3d <sub>5/2</sub> | total |
| Mo <sup>6+</sup> | 39.74                  | 60.26             | 100   | 7.2                    | 15.8              | 23.0  |
| Mo <sup>5+</sup> | -                      | -                 | -     | 5.1                    | 15.6              | 20.7  |
| Mo <sup>4+</sup> | -                      | -                 | -     | 22.9                   | 33.4              | 56.3  |



Table S2. The contents of  $\text{Fe}^{3+}/\text{Fe}^{2+}$  from XPS spectrum of a- $\text{FeO}_x$ -NG and c- $\text{Fe}_3\text{O}_4$ -NG.

|                  | a- $\text{FeO}_x$ -NG |                   |       | c- $\text{Fe}_3\text{O}_4$ -NG |                   |       |
|------------------|-----------------------|-------------------|-------|--------------------------------|-------------------|-------|
|                  | $2\text{P}_{1/2}$     | $2\text{P}_{3/2}$ | total | $2\text{P}_{1/2}$              | $2\text{P}_{3/2}$ | total |
| $\text{Fe}^{3+}$ | 30.6                  | 42.9              | 73.5  | 23.4                           | 45.8              | 69.2  |
| $\text{Fe}^{2+}$ | 10.3                  | 16.2              | 26.5  | 11.2                           | 19.6              | 30.8  |

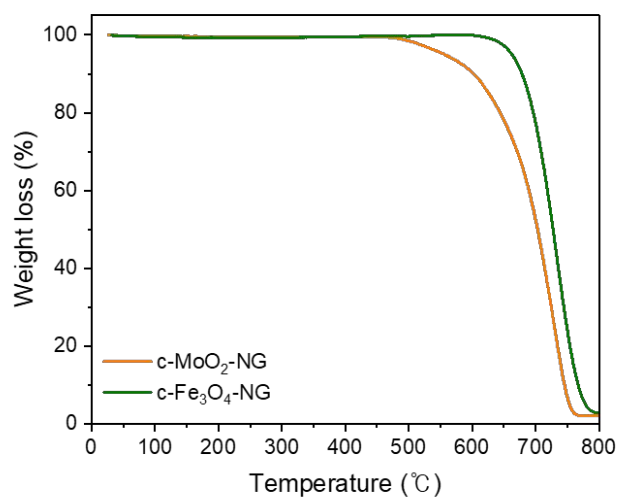

Figure S7. Thermogravimetric analysis curve of c-Fe<sub>3</sub>O<sub>4</sub>-NG and c-MoO<sub>2</sub>-NG composite.

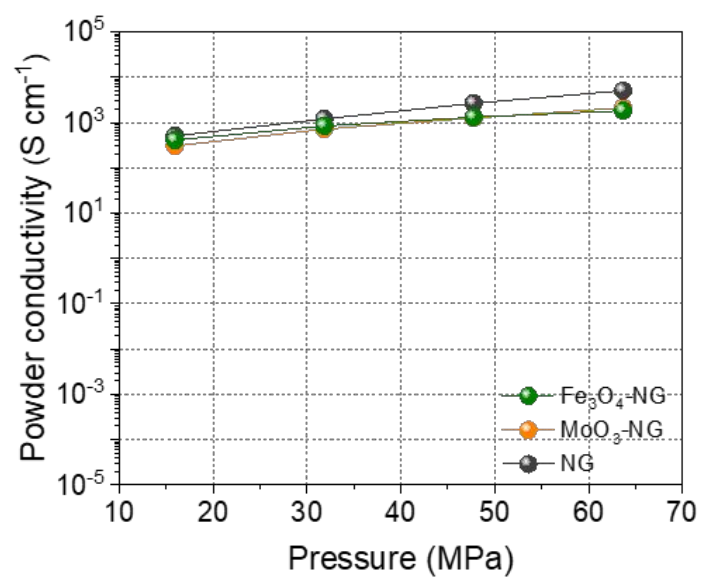

Figure S8. Powder conductivities of pristine NG, c-MoO<sub>2</sub>-NG and c-Fe<sub>3</sub>O<sub>4</sub>-NG.

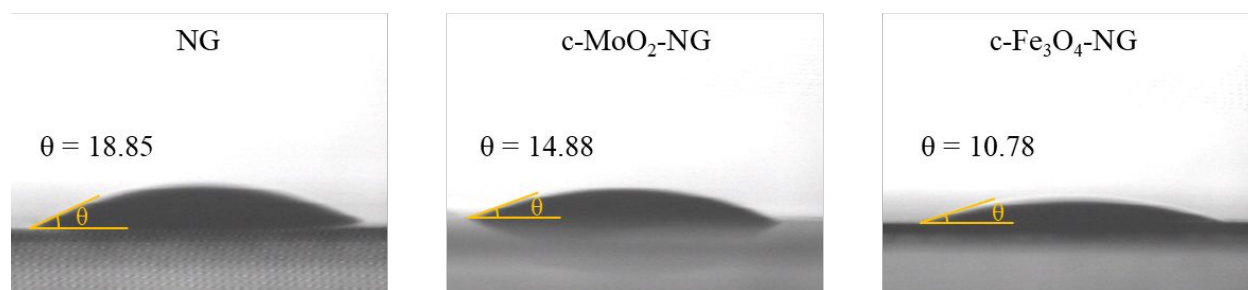

Figure S9. Static contact angles of pristine NG, c-MoO<sub>2</sub>-NG and c-Fe<sub>3</sub>O<sub>4</sub>-NG anodes.

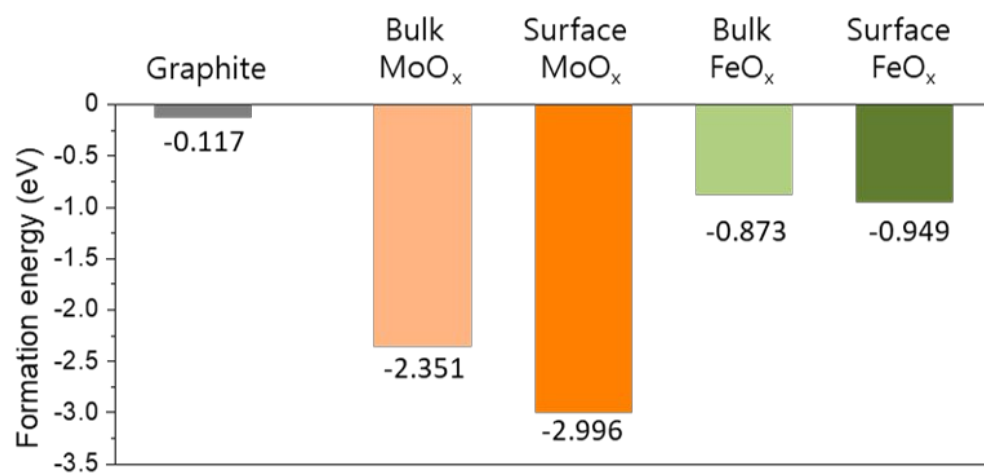

Figure S10. Comparison of calculated formation energies for Li<sup>+</sup> adsorption of MoO<sub>x</sub> and FeO<sub>x</sub>.

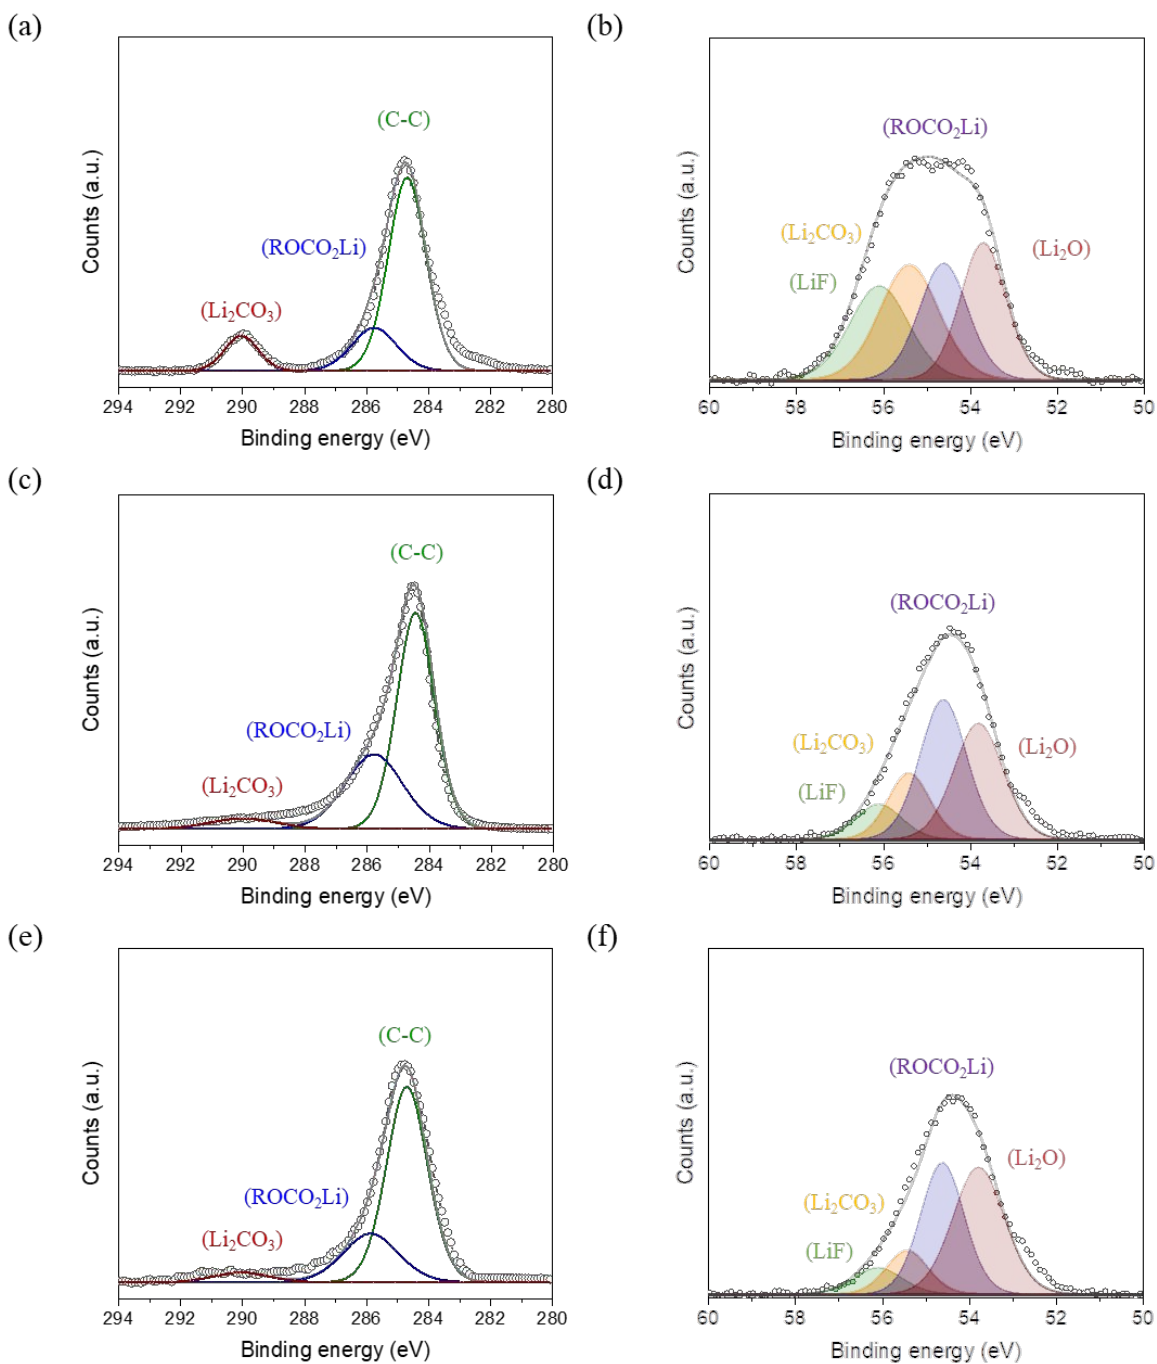

Figure S11. XPS C 1s and Li 1s spectra of (a, b) NG, (c, d) c-MoO<sub>2</sub>-NG and (e, f) c-Fe<sub>3</sub>O<sub>4</sub>-NG anodes after cycling.

Table S3. Fitting results of the Nyquist plots using the equivalent circuit.

|                                      | OCV   |          | After 1 <sup>st</sup> charge |           |          |
|--------------------------------------|-------|----------|------------------------------|-----------|----------|
|                                      | $R_b$ | $R_{ct}$ | $R_b$                        | $R_{SEI}$ | $R_{ct}$ |
| c-Fe <sub>3</sub> O <sub>4</sub> -NG | 0.9   | 203.4    | 1.5                          | 94.7      | 35.0     |
| c-MoO <sub>2</sub> -NG               | 1.3   | 217.5    | 2.0                          | 75.9      | 29.7     |
| Pristine NG                          | 1.4   | 313.4    | 5.3                          | 211.1     | 38.9     |

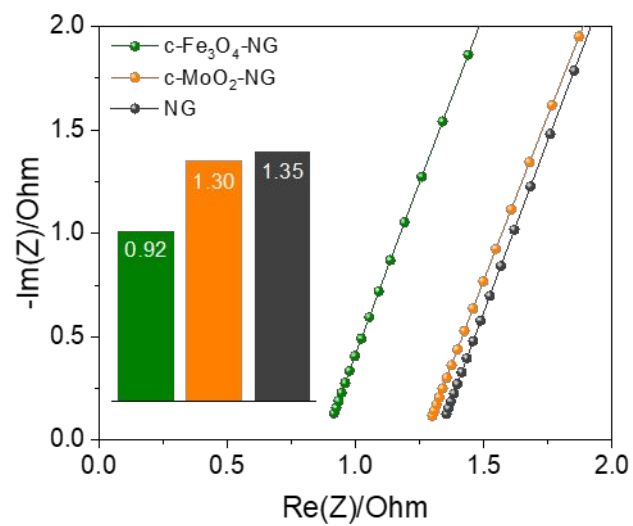

Figure S12. Nyquist plots for magnified high-frequency region of pristine NG, c-MoO<sub>2</sub>-NG and c-Fe<sub>3</sub>O<sub>4</sub>-NG anodes.



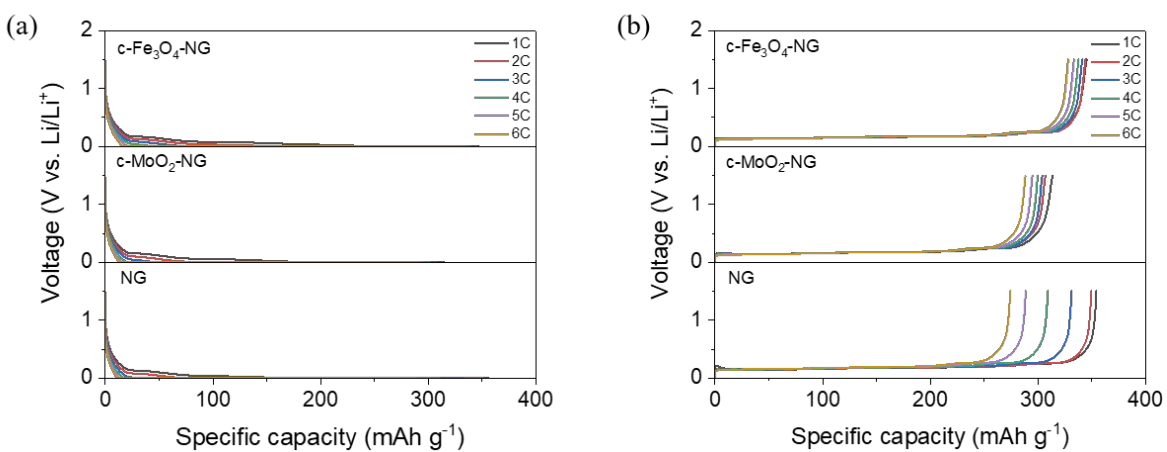

Figure S13. Voltage profiles during (a) charging and (b) discharging process of pristine NG, c-MoO<sub>2</sub>-NG and c-Fe<sub>3</sub>O<sub>4</sub>-NG anodes recorded at various current densities from 1 C to 6 C.

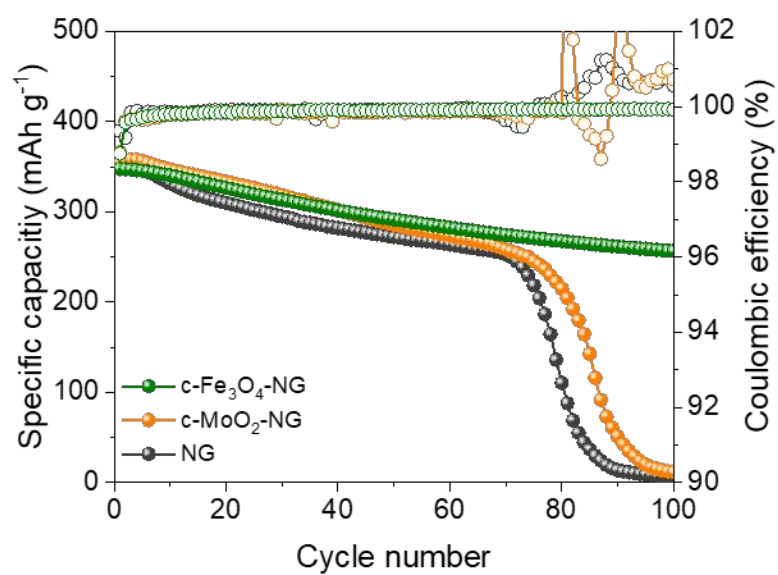

Figure S14. Cycle performance of pristine NG, c-MoO<sub>2</sub>-NG and c-Fe<sub>3</sub>O<sub>4</sub>-NG anodes at a constant current density of 1 C for 100 cycles.

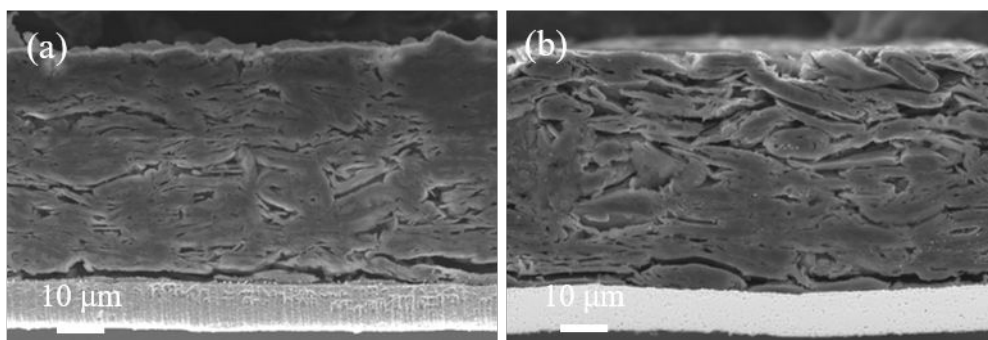

Figure S15. Cross-sectional SEM images of (a) pristine NG and (b) c-Fe<sub>3</sub>O<sub>4</sub>-NG anodes after the 300 cycles.
